# Supplementary material for: Enhanced solvent-free selective oxidation of cyclohexene to 1,2-cyclohexanediol by polyaniline@halloysite nanotubes
Source: Royal Society of Chemistry journal article supplement (doi:10.1039/c7ta02605f), 2017-01-01
Supplement: c7ta02605f1.pdf [file c7ta02605f1.pdf]

## **Supporting Information**

### **Enhanced solvent-free selective oxidation of cyclohexene to 1,2-cyclohexanediol by polyaniline@halloysite nanotubes**

**Tianzhu Zhou, Yue Zhao, Wenmei Han, Huazhong Xie, Cuiping Li\* and  
Mingquan Yuan\***

School of Chemical Science and Technology, Key Laboratory of Medicinal Chemistry for Natural  
Resource, Ministry of Education, Yunnan University, Kunming 650091, China

\*To whom correspondence should be addressed, E-mail: licp830@iccas.ac.cn and  
yuanmingquan@ynu.edu.cn

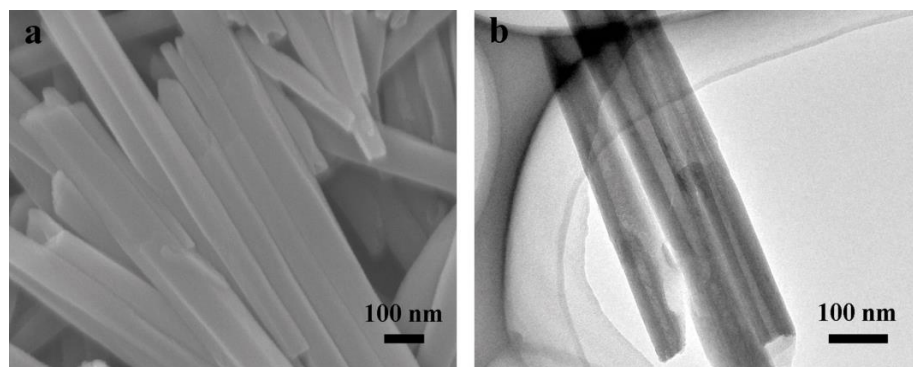

**Fig. S1** SEM (a) and TEM (b) of halloysite nanotubes (HA).

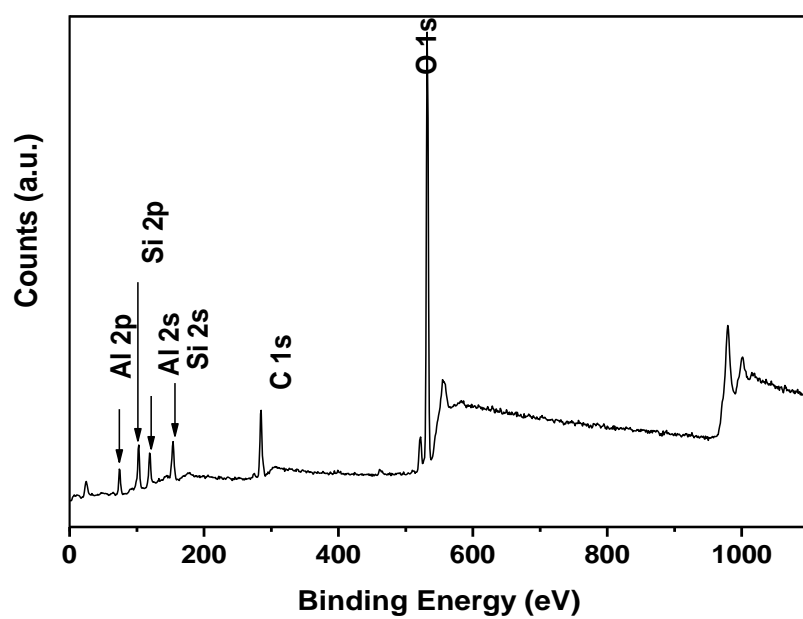

**Fig. S2** XPS spectra of halloysite nanotubes (HA) (C peak from the adventitious elemental carbon).

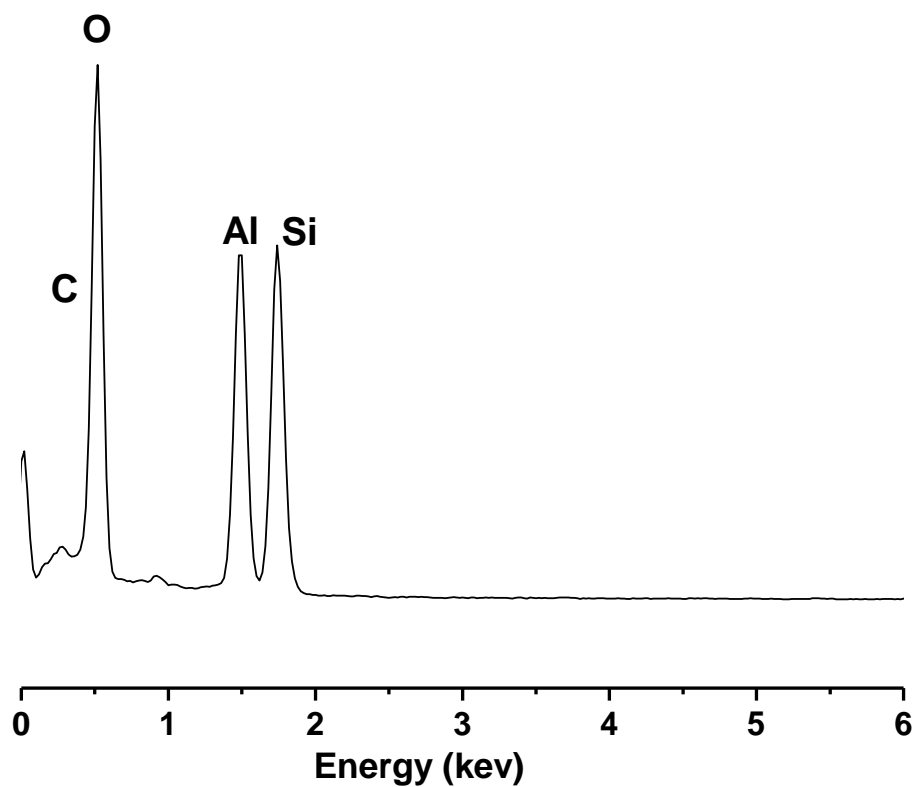

**Fig. S3** EDX spectroscopy of halloysite nanotubes (HA) (C peak from the carbon-coated copper grids).

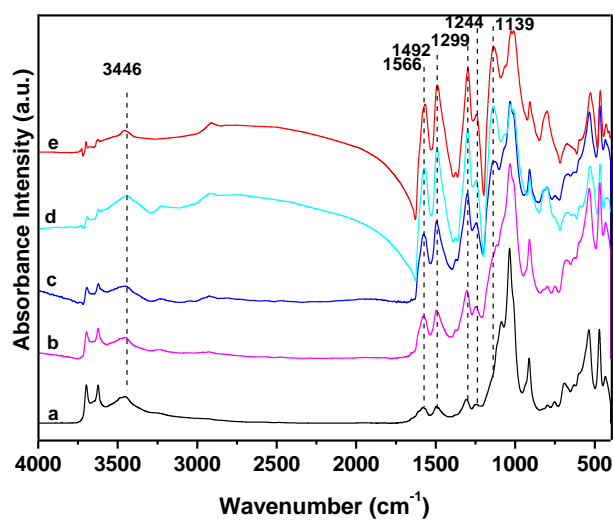

**Fig. S4** FT-IR spectra of the PANI@HA nanotubes fabricated in 1 M HCl with different ANI/HA weight ratio: (a) 0.10, (b) 0.41, (c) 1.02, (d) 2.04, (e) 2.24.

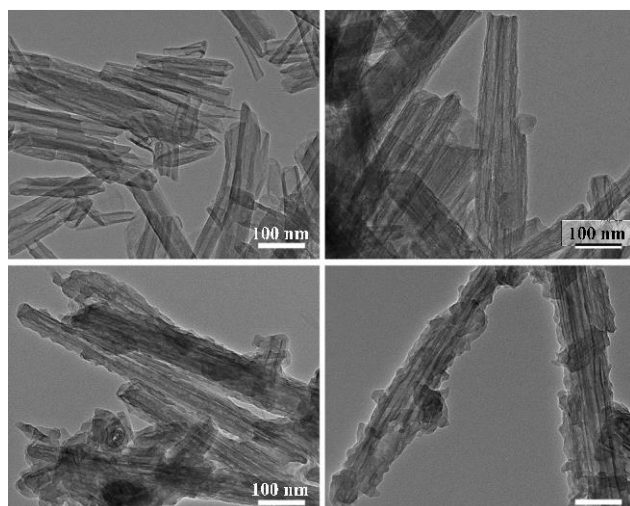

**Fig. S5** TEM images of the PANI@HA nanotubes fabricated in 1 M HCl with different ANI/HA weight ratio: (a) 0.10, (b) 0.41, (c) 1.02 and (d) 2.04.

**Table S1** Chemical composition of HA and PANI@HA/1 M/2.04-H.

| Sample                                         | Atomic concentration (%) |      |      |      |      |     |     |     |
|------------------------------------------------|--------------------------|------|------|------|------|-----|-----|-----|
|                                                | Si                       | Al   | O    | C    | N    | Cl  | S   | P   |
| HA                                             | 13.7                     | 10.1 | 55.5 | 20.7 | -    | -   | -   | -   |
| PANI@HA/1M/2.04-H <sub>3</sub> PO <sub>4</sub> | 0.9                      | 0.8  | 13.5 | 76.3 | 8.4  | -   | -   | 0.1 |
| PANI@HA/1M/2.04-HNO <sub>3</sub>               | 1.7                      | 1.4  | 14.7 | 74.2 | 8.0  | -   | -   | -   |
| PANI@HA/1M/2.04-H <sub>2</sub> SO <sub>4</sub> | 1.0                      | 1.0  | 15.6 | 71.7 | 10.0 | -   | 0.7 | -   |
| PANI@HA/1 M/2.04-HCl                           | 1.0                      | 1.0  | 13.8 | 71.8 | 11.5 | 0.8 | -   | -   |

**Table S2** Mass ratio, doping degree and Q/B of PANI in PANI@HA/A/W-H.

| Sample                                          | The acidity<br>tuned by        | Mass<br>ratio<br>of<br>PANI<br>(%) | Doping<br>degree<br>of<br>PANI (%) | Q/B  |
|-------------------------------------------------|--------------------------------|------------------------------------|------------------------------------|------|
| PANI@HA/1 M/2.04-H <sub>3</sub> PO <sub>4</sub> | H <sub>3</sub> PO <sub>4</sub> | 51.8                               | 26.6                               | 1.32 |
| PANI@HA/1 M/2.04-HNO <sub>3</sub>               | HNO <sub>3</sub>               | 42.5                               | 27.3                               | 1.24 |
| PANI@HA/1 M/2.04-H <sub>2</sub> SO <sub>4</sub> | H <sub>2</sub> SO <sub>4</sub> | 45.9                               | 29.1                               | 1.20 |
| PANI@HA/1 M/2.04-HCl                            | HCl                            | 36.8                               | 34.7                               | 1.00 |
| PANI@HA/0.3 M/2.04-HCl                          | HCl                            | 35.2                               | -                                  | -    |
| PANI@HA/0.03 M/2.04-HCl                         | HCl                            | 34.7                               | -                                  | -    |

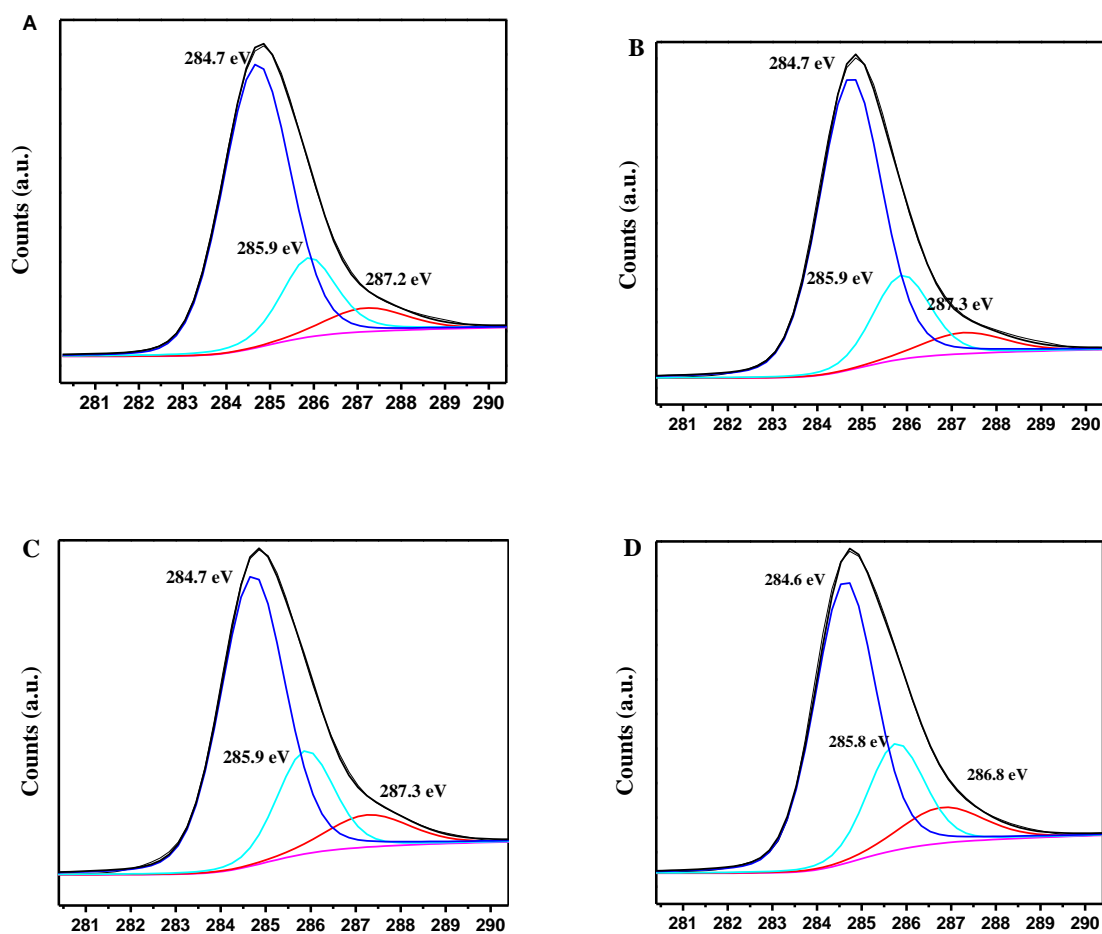

**Fig. S6** C1s deconvoluted spectra of PANI@HA/1 M/2.04-H: the acidity of the starting solutions is respectively adjusted by A) H<sub>3</sub>PO<sub>4</sub>, B) HNO<sub>3</sub>, C) H<sub>2</sub>SO<sub>4</sub> and D) HCl.

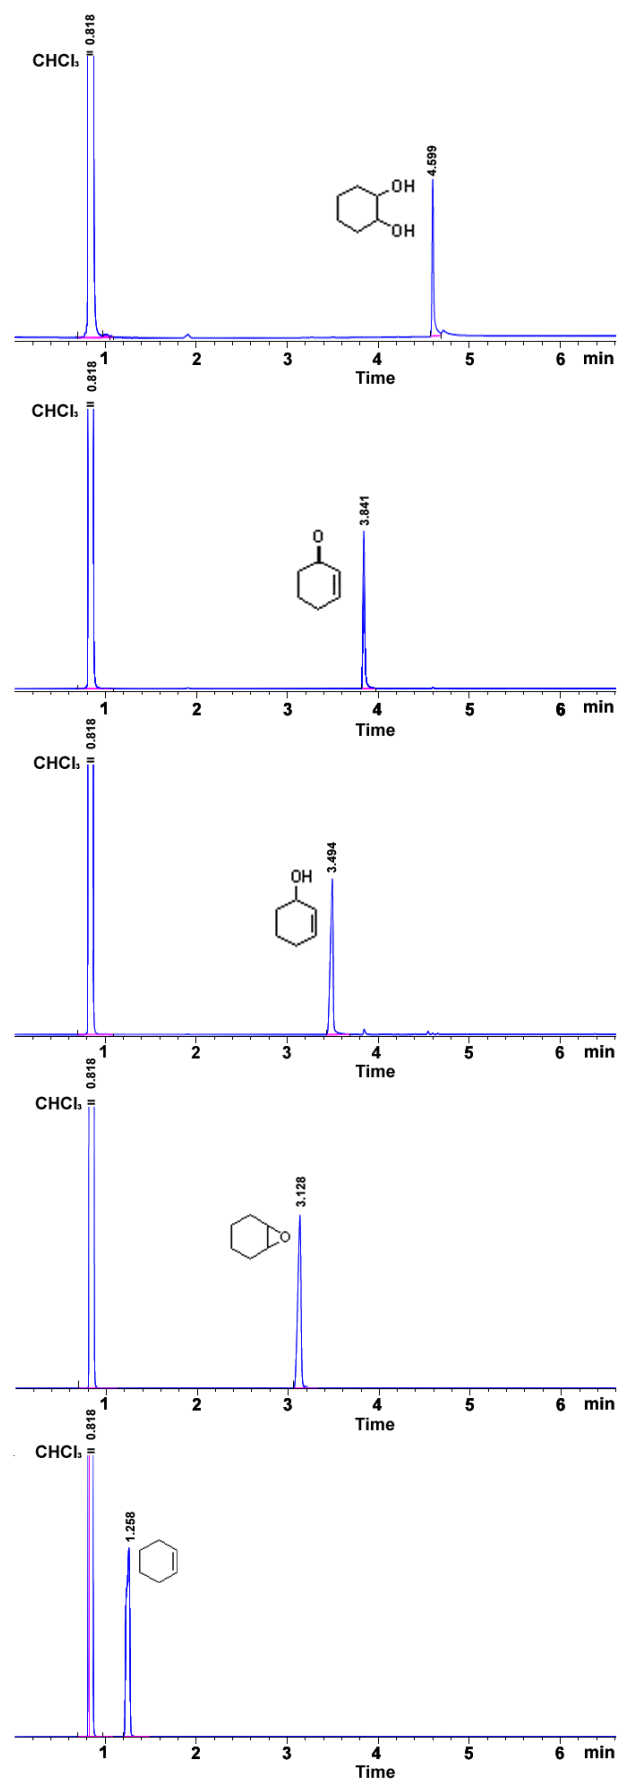

**Fig. S7** GC spectra of 99% cyclohexene, epoxy cyclohexane, 2-cyclohexen-1-ol,

2-cyclohexen-1-one and 1,2-cyclohexandiol.

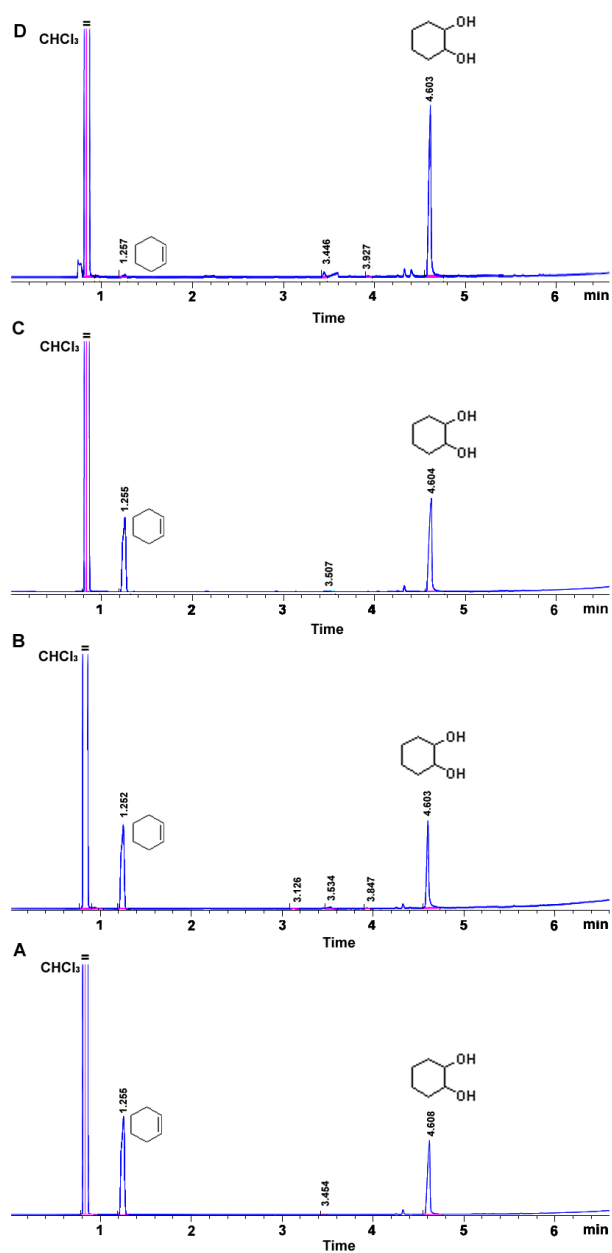

**Fig. S8** GC spectra of the reaction products for cyclohexene oxidation with A) PANI@HA/1 M/2.04-H<sub>3</sub>PO<sub>4</sub>, B) PANI@HA/1 M/2.04-HNO<sub>3</sub>, C) PANI@HA/1 M/2.04-H<sub>2</sub>SO<sub>4</sub> and D) PANI@HA/1 M/2.04-HCl as catalyst.

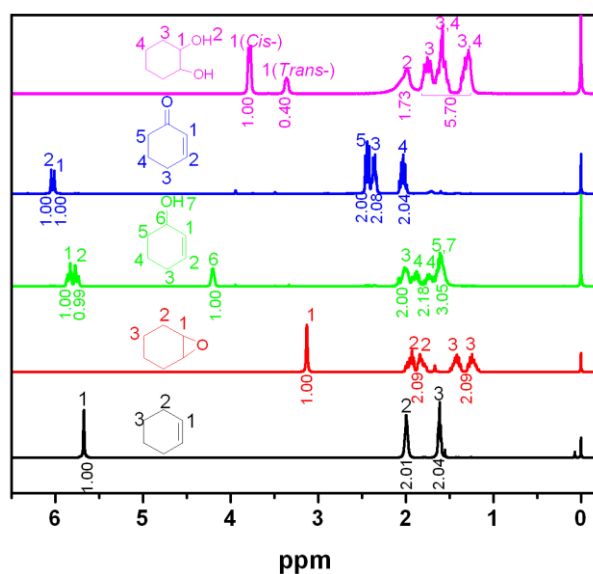

**Fig. S9**  $^1\text{H}$  NMR spectra (300MHz,  $\text{CDCl}_3$ ) of cyclohexene, epoxy cyclohexane, 2-cyclohexen-1-ol, 2-cyclohexen-1-one, and 1,2-cyclohexandiol.

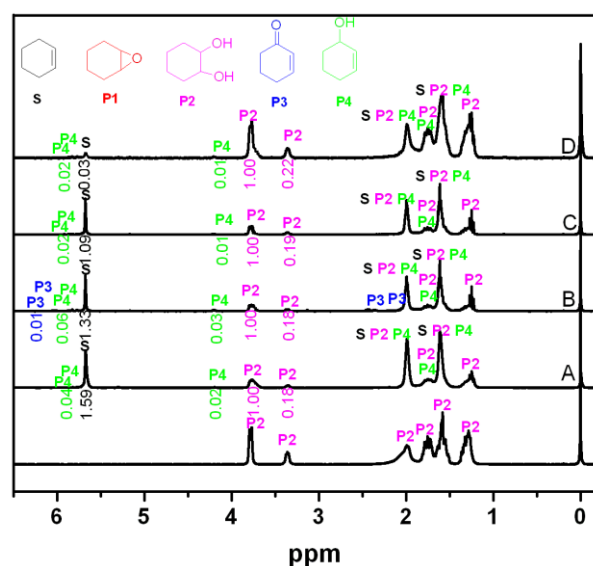

**Fig. S10**  $^1\text{H}$  NMR spectra (300MHz,  $\text{CDCl}_3$ ) of the reaction products for cyclohexene oxidation with A) PANI@HA/1 M/2.04- $\text{H}_3\text{PO}_4$ , B) PANI@HA/1 M/2.04- $\text{HNO}_3$ , C) PANI@HA/1 M/2.04- $\text{H}_2\text{SO}_4$  and D) PANI@HA/1 M/2.04- $\text{HCl}$  as catalyst. The bottom  $^1\text{H}$  NMR spectrum is 99% 1,2-cyclohexandiol.



**Table S3** Effect of ANI/HA weight ratio in the fabrication on selective oxidation of cyclohexene with PANI@HA/1 M/W-HCl as catalyst.

| PANI@HA/1 M/W-HCl    | Product selectivity (%)                                                           |                                                                                   |                                                                                    |                                                                                     | Conversion (%) |
|----------------------|-----------------------------------------------------------------------------------|-----------------------------------------------------------------------------------|------------------------------------------------------------------------------------|-------------------------------------------------------------------------------------|----------------|
|                      | 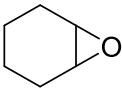 |  |  |  |                |
| PANI@HA/1 M/0.20-HCl | 1.57                                                                              | 95.87                                                                             | 0                                                                                  | 2.56                                                                                | 4.26           |
| PANI@HA/1 M/0.41-HCl | 0.85                                                                              | 96.72                                                                             | 0                                                                                  | 2.43                                                                                | 12.77          |
| PANI@HA/1 M/1.02-HCl | 0.57                                                                              | 97.28                                                                             | 0                                                                                  | 2.16                                                                                | 32.87          |
| PANI@HA/1 M/2.04-HCl | 0                                                                                 | 99.50                                                                             | 0.05                                                                               | 0.45                                                                                | 98.17          |
| PANI@HA/1 M/2.24-HCl | 0                                                                                 | 99.05                                                                             | 0                                                                                  | 0.95                                                                                | 98.32          |

Reaction conditions: 20 mg catalyst, 1.23 mL cyclohexene, 2.5 mL H<sub>2</sub>O<sub>2</sub>, 70 °C, 24 h.

**Table S4** Effect of reaction time on selective oxidation of cyclohexene with PANI@HA/1 M/2.04-HCl as catalyst.

| Reaction time (h) | Product selectivity (%)                                                             |                                                                                     |                                                                                    |                                                                                      | Conversion (%) |
|-------------------|-------------------------------------------------------------------------------------|-------------------------------------------------------------------------------------|------------------------------------------------------------------------------------|--------------------------------------------------------------------------------------|----------------|
|                   | 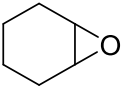 |  |  |  |                |
| 0.5               | 5.54                                                                                | 83.90                                                                               | 2.99                                                                               | 7.56                                                                                 | 0.31           |
| 1                 | 4.12                                                                                | 86.88                                                                               | 4.75                                                                               | 4.25                                                                                 | 0.38           |
| 2                 | 2.74                                                                                | 89.21                                                                               | 1.11                                                                               | 6.94                                                                                 | 0.40           |
| 4                 | 0.79                                                                                | 97.46                                                                               | 0.34                                                                               | 1.39                                                                                 | 0.83           |
| 8                 | 0.45                                                                                | 98.38                                                                               | 0                                                                                  | 1.17                                                                                 | 7.35           |
| 12                | 0.14                                                                                | 99.07                                                                               | 0                                                                                  | 0.79                                                                                 | 44.64          |
| 16                | 0                                                                                   | 99.23                                                                               | 0                                                                                  | 0.77                                                                                 | 87.12          |
| 20                | 0                                                                                   | 99.38                                                                               | 0                                                                                  | 0.62                                                                                 | 92.34          |
| 24                | 0                                                                                   | 99.50                                                                               | 0.05                                                                               | 0.45                                                                                 | 98.17          |
| 48                | 0                                                                                   | 94.07                                                                               | 0                                                                                  | 5.93                                                                                 | 99.69          |

Reaction conditions: 20 mg catalyst, 1.23 mL cyclohexene, 2.5 mL H<sub>2</sub>O<sub>2</sub>, 70 °C.

**Table S5** Effect of reaction temperature on selective oxidation of cyclohexene with PANI@HA/1 M/2.04-HCl as catalyst.

| T (°C) | Product selectivity (%)                                                           |                                                                                   |                                                                                   |                                                                                     | Conversion (%) |
|--------|-----------------------------------------------------------------------------------|-----------------------------------------------------------------------------------|-----------------------------------------------------------------------------------|-------------------------------------------------------------------------------------|----------------|
|        | 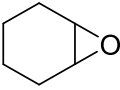 |  |  |  |                |
| 30     | 0.95                                                                              | 90.91                                                                             | 3.07                                                                              | 5.08                                                                                | 0.49           |
| 40     | 0.89                                                                              | 95.09                                                                             | 0.60                                                                              | 3.41                                                                                | 0.65           |
| 50     | 0.62                                                                              | 97.6                                                                              | 0                                                                                 | 1.79                                                                                | 1.17           |
| 60     | 0.21                                                                              | 99.49                                                                             | 0                                                                                 | 0.30                                                                                | 46.78          |
| 70     | 0                                                                                 | 99.50                                                                             | 0.05                                                                              | 0.45                                                                                | 98.17          |
| 80     | 0                                                                                 | 99.71                                                                             | 0                                                                                 | 0.29                                                                                | 99.00          |

Reaction conditions: 20 mg catalyst, 1.23 mL cyclohexene, 2.5 mL H<sub>2</sub>O<sub>2</sub>, 24 h.

**Table S6** Effect of solvent on selective oxidation of cyclohexene with PANI@HA/1 M/2.04-HCl as catalyst.

| Solvent                                      | Product selectivity (%)                                                             |                                                                                     |                                                                                     |                                                                                       | Conversion (%) |
|----------------------------------------------|-------------------------------------------------------------------------------------|-------------------------------------------------------------------------------------|-------------------------------------------------------------------------------------|---------------------------------------------------------------------------------------|----------------|
|                                              | 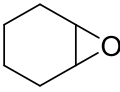 |  |  |  |                |
| Solvent-free                                 | 0                                                                                   | 99.50                                                                               | 0.05                                                                                | 0.45                                                                                  | 98.17          |
| n-Heptane                                    | 0.78                                                                                | 98.33                                                                               | 0                                                                                   | 0.89                                                                                  | 3.79           |
| THF                                          | 1.09                                                                                | 96.50                                                                               | 0.32                                                                                | 2.08                                                                                  | 3.63           |
| CH <sub>2</sub> Cl <sub>2</sub> <sup>a</sup> | 3.39                                                                                | 88.59                                                                               | 4.49                                                                                | 3.54                                                                                  | 1.66           |
| CHCl <sub>3</sub>                            | 3.88                                                                                | 91.79                                                                               | 0.63                                                                                | 3.70                                                                                  | 5.32           |
| CH <sub>3</sub> CN                           | 0.66                                                                                | 94.61                                                                               | 2.71                                                                                | 2.02                                                                                  | 29.01          |
| DMSO                                         | 24.35                                                                               | 65.63                                                                               | 10.01                                                                               | 0                                                                                     | 40.68          |

<sup>a</sup>Cyclohexene oxidation according to the oxidation process of method B.

Reaction conditions: 20 mg catalyst, 1.23 mL cyclohexene, 2.5 mL H<sub>2</sub>O<sub>2</sub>, 70 °C, 24 h.

**Table S7** Effect of oxidant on selective oxidation of cyclohexene with PANI@HA/1 M/2.04-HCl as catalyst.

| Oxidant                              | Product Selectivity (%)                                                           |                                                                                   |                                                                                   |                                                                                     | Conversion (%) |
|--------------------------------------|-----------------------------------------------------------------------------------|-----------------------------------------------------------------------------------|-----------------------------------------------------------------------------------|-------------------------------------------------------------------------------------|----------------|
|                                      | 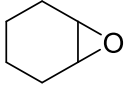 |  |  |  |                |
| H <sub>2</sub> O <sub>2</sub> -free  | 1.79                                                                              | 52.39                                                                             | 18.90                                                                             | 26.92                                                                               | 2.91           |
| 1.3 mL H <sub>2</sub> O <sub>2</sub> | 0.29                                                                              | 99.27                                                                             | 0.15                                                                              | 0.28                                                                                | 38.62          |
| 2.5 mL H <sub>2</sub> O <sub>2</sub> | 0                                                                                 | 99.50                                                                             | 0.05                                                                              | 0.45                                                                                | 98.17          |
| 5.0 mL H <sub>2</sub> O <sub>2</sub> | 0.48                                                                              | 97.28                                                                             | 0.26                                                                              | 1.99                                                                                | 40.69          |
| 7.5 mL H <sub>2</sub> O <sub>2</sub> | 0                                                                                 | 98.91                                                                             | 0.16                                                                              | 0.94                                                                                | 26.56          |
| O <sub>2</sub>                       | 3.71                                                                              | 67.91                                                                             | 11.89                                                                             | 16.49                                                                               | 5.20           |
| Air                                  | 1.79                                                                              | 52.39                                                                             | 18.90                                                                             | 26.92                                                                               | 2.91           |

Reaction conditions: 20 mg catalyst, 1.23 mL cyclohexene, 70 °C, 24 h.

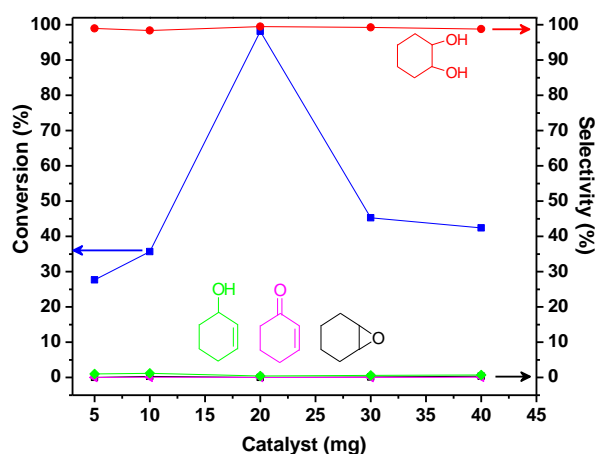

**Fig. S11** Effect of catalyst amount on selective oxidation of cyclohexene with PANI@HA/1 M/2.04-HCl as catalyst.

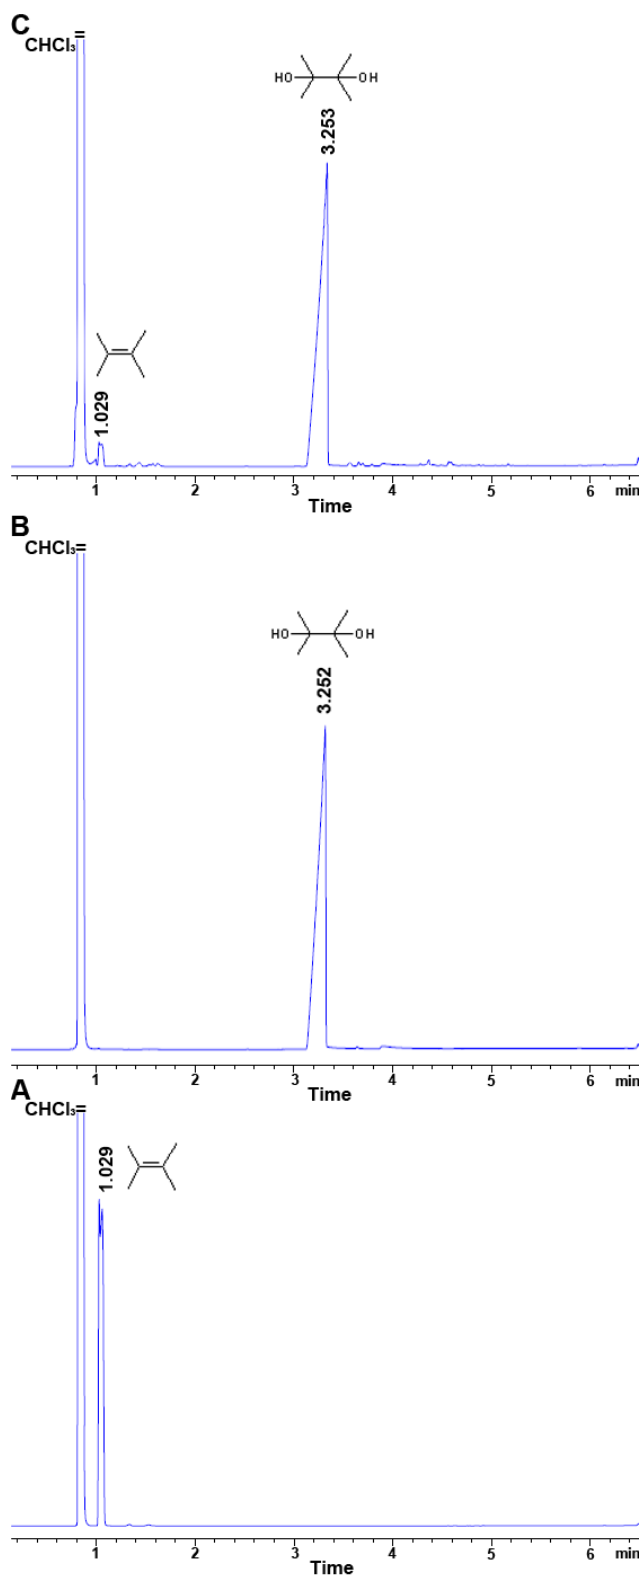

**Fig. S12** GC spectra of (A) 98% 2,3-dimethyl-2-butene, (B) 98% 2,3-dimethyl-2,3-butanediol (pinacol) and (C) the reaction products for 2,3-dimethyl-2-butene oxidation with PANI@HA/1 M/2.04-HCl as catalyst at 70 °C.

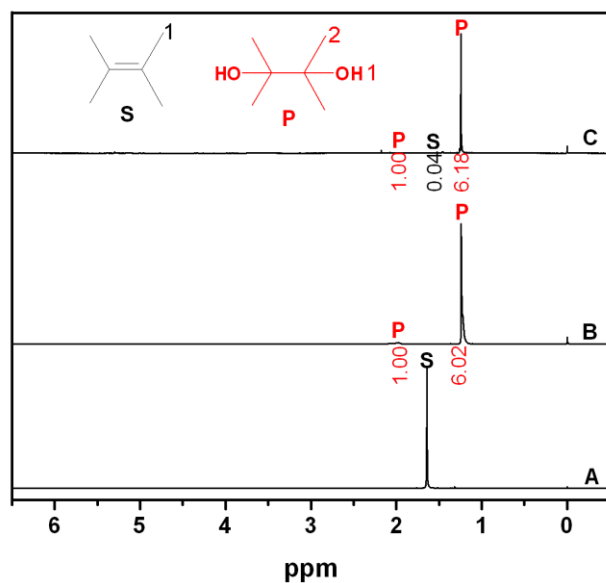

**Fig. S13** <sup>1</sup>H NMR spectra (300MHz, CDCl<sub>3</sub>) of (A) 98% 2,3-dimethyl-2-butene, (B) 98% 2,3-dimethyl-2,3-butanediol (pinacol) and (C) the reaction products for 2,3-dimethyl-2-butene oxidation with PANI@HA/1 M/2.04-HCl as catalyst at 70 °C.

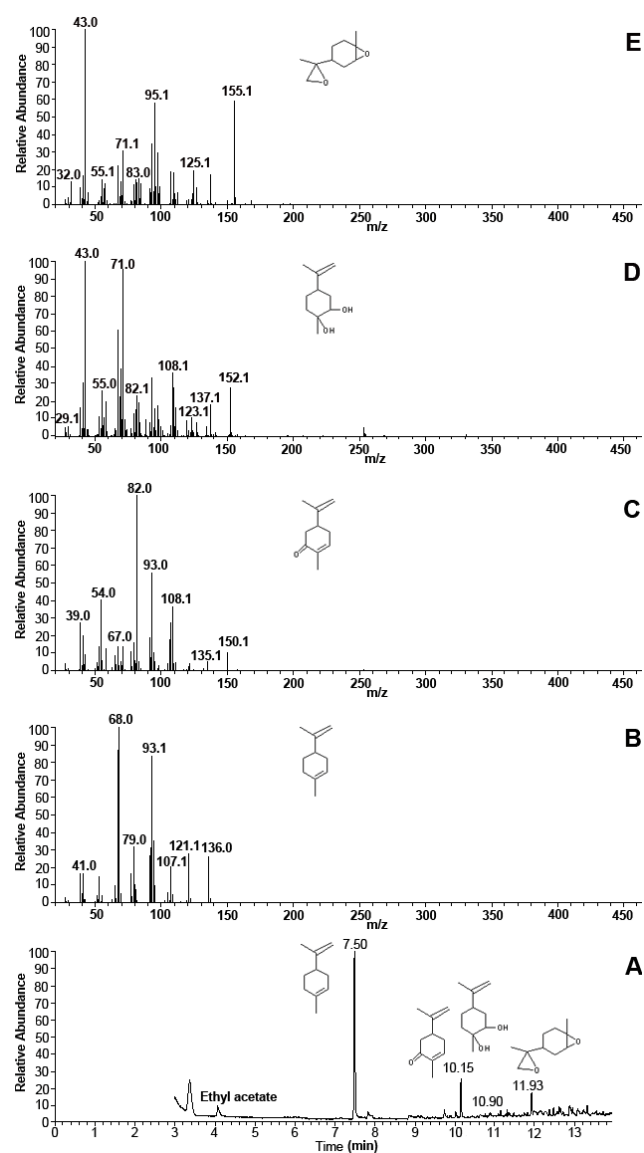

**Fig. S14** (A) GC spectra of the reaction products for (R)-(+)-limonene oxidation with PANI@HA/1 M/2.04-HCl as catalyst at 90 °C; (B), (C), (D) and (E) the MS spectra of (A) at the retention time of 7.50, 10.15, 10.90 and 11.93 min, respectively.

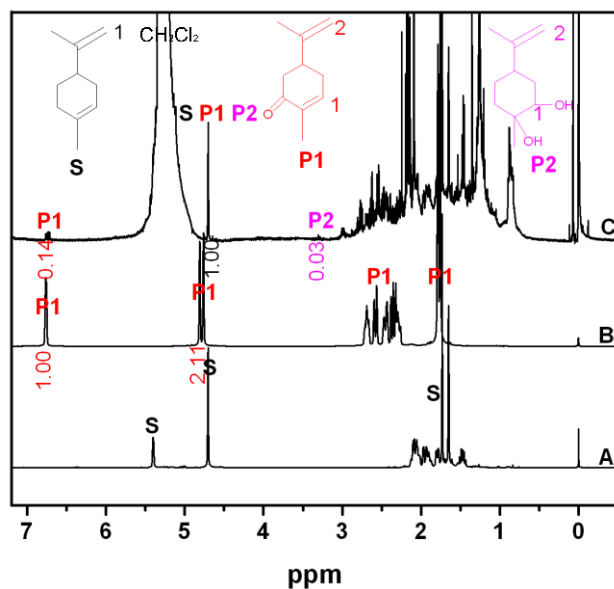

**Fig. S15**  $^1\text{H}$  NMR spectra (300MHz,  $\text{CDCl}_3$ ) of (A) 97% (R)-(+)-limonene, (B) 98% (R)-(-)-carvone, (C) the reaction products for (R)-(+)-limonene oxidation with PANI@HA/1 M/2.04-HCl as catalyst at 90 °C.

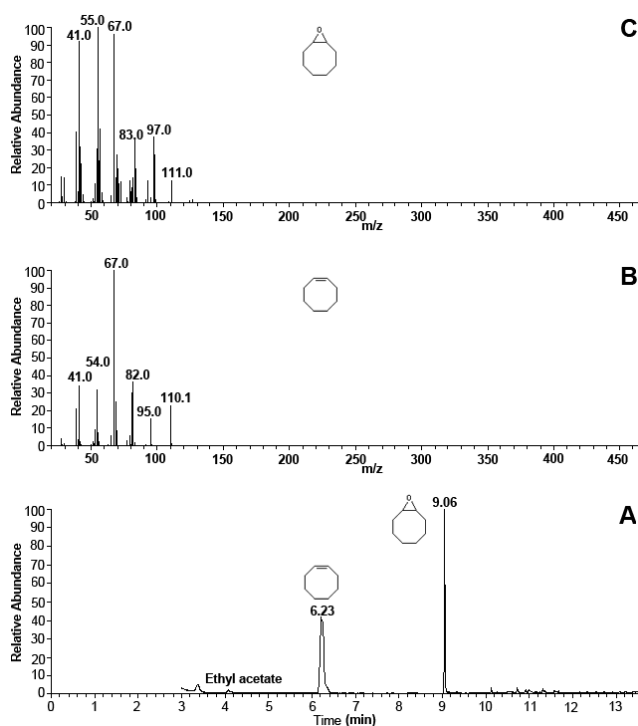

**Fig. S16** (A) GC spectra of the reaction products for cyclooctene oxidation with PANI@HA/1 M/2.04-HCl as catalyst at 90 °C; (B) and (C) the MS spectra of (A) at the retention time of 6.23 and 9.06 min, respectively.

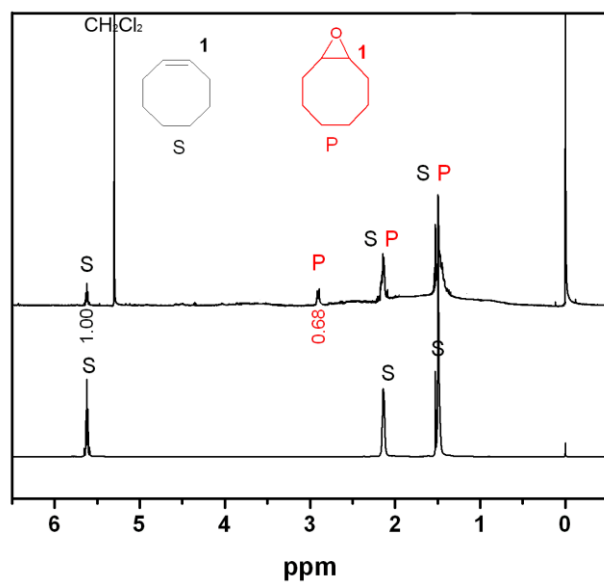

**Fig. S17** <sup>1</sup>H NMR spectra (300MHz, CDCl<sub>3</sub>) of the reaction products for cyclooctene oxidation with PANI@HA/1 M/2.04-HCl as catalyst at 90 °C. The bottom <sup>1</sup>H NMR spectrum is 96% cyclooctene.



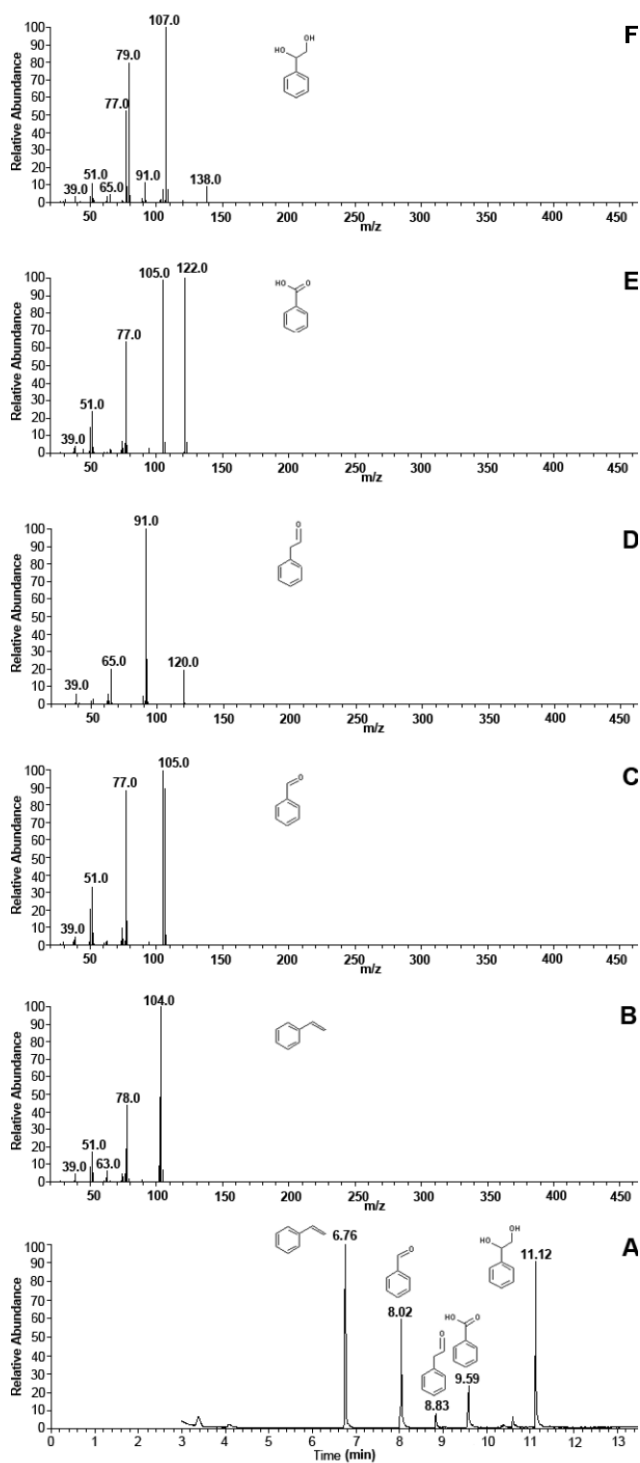

**Fig. S18** (A) GC spectra of the reaction products for styrene oxidation with PANI@HA/1 M/2.04-HCl as catalyst at 80 °C; (B), (C), (D), (E) and (F) the MS spectra of (A) at the retention time of 6.76, 8.02, 8.83, 9.59 and 11.12 min, respectively.

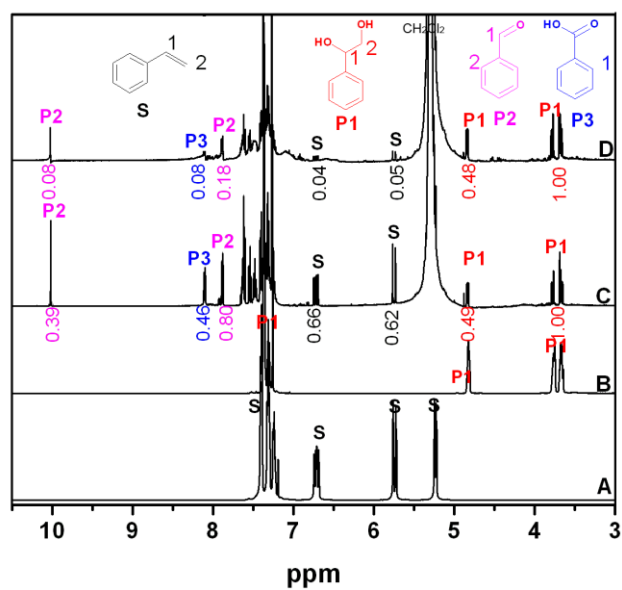

**Fig. S19**  $^1\text{H}$  NMR spectra (300MHz,  $\text{CDCl}_3$ ) of (A) 98% styrene, (B) 99% 1-phenyl-1,2-ethanediol; (C) and (D) the reaction products for styrene oxidation with PANI@HA/1 M/2.04-HCl as catalyst at 80 °C and 90 °C, respectively.

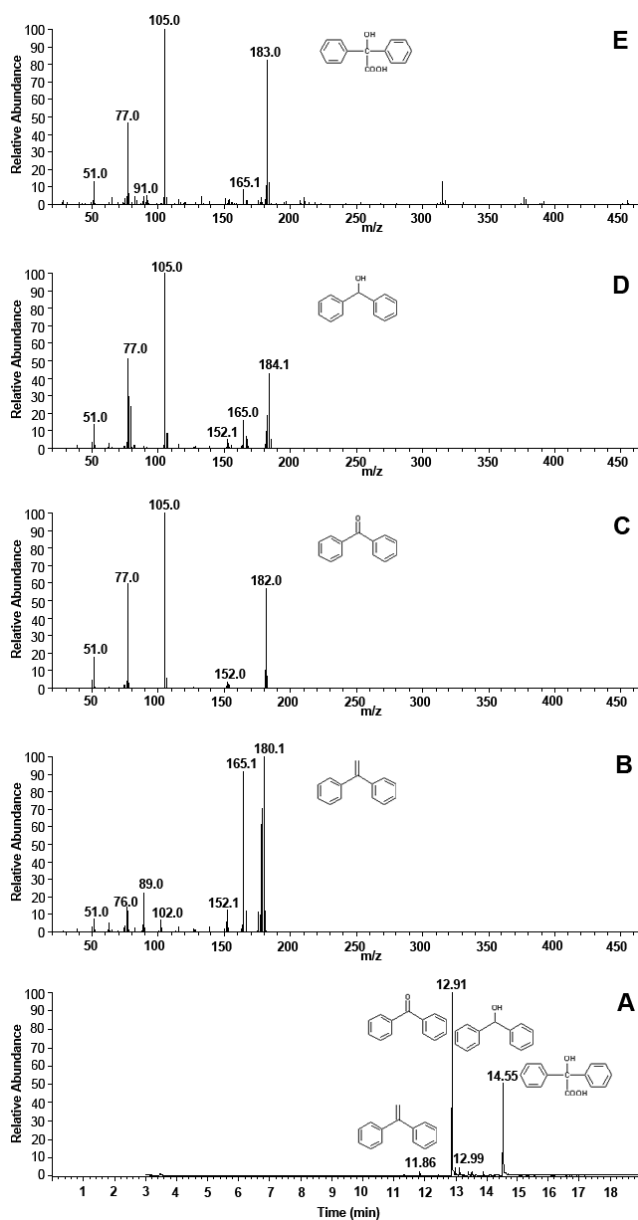

**Fig. S20** (A) GC spectra of the reaction products for 1,1-diphenyl ethylene oxidation with PANI@HA/1 M/2.04-HCl as catalyst at 90 °C; (B), (C), (D) and (E) the MS spectra of (A) at the retention time of 11.86, 12.91, 12.99 and 14.55 min, respectively.

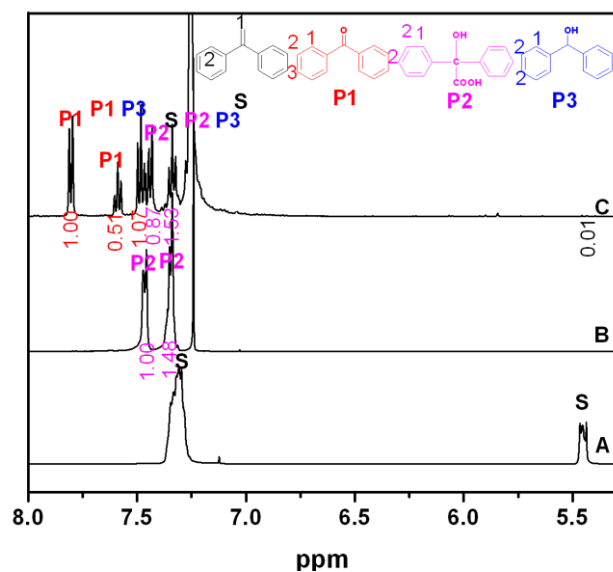

**Fig. S21**  $^1\text{H}$  NMR spectra (300MHz,  $\text{CDCl}_3$ ) of (A) 98% 1,1-diphenyl ethylene, (B) 98% 2,2-diphenyl-2-hydroxyacetic acid and (C) the reaction products for 1,1-diphenyl ethylene oxidation with PANI@HA/1 M/2.04-HCl as catalyst at 90 °C.

**Table S8** Recycling study with PANI@HA/1M/2.04-HCl as catalyst.

| Cycles | Product Selectivity (%)                                                             |                                                                                     |                                                                                     |                                                                                       | Conversion (%) |
|--------|-------------------------------------------------------------------------------------|-------------------------------------------------------------------------------------|-------------------------------------------------------------------------------------|---------------------------------------------------------------------------------------|----------------|
|        | 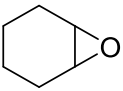 |  |  |  |                |
| 1      | 0                                                                                   | 99.50                                                                               | 0.05                                                                                | 0.45                                                                                  | 98.17          |
| 2      | 0                                                                                   | 97.16                                                                               | 0.52                                                                                | 2.32                                                                                  | 98.78          |
| 3      | 0                                                                                   | 91.66                                                                               | 0.47                                                                                | 7.91                                                                                  | 99.43          |
| 4      | 0                                                                                   | 95.15                                                                               | 0.20                                                                                | 4.65                                                                                  | 99.45          |
| 5      | 0                                                                                   | 96.92                                                                               | 1.21                                                                                | 1.87                                                                                  | 99.11          |

Reaction conditions: 20 mg catalyst, 1.23 mL cyclohexene, 2.5 mL  $\text{H}_2\text{O}_2$ , 70 °C, 24 h.
